# Supplementary material for: Enucleated globes with advanced retinoblastoma: correlation of histopathological features and reclassification of tumors according to the 8th edition of the American Joint Committee on Cancer (AJCC)
Source: Springer Nature journal article supplement (doi:10.1007/s10792-020-01342-3), 2020-03-19
Supplement: MOESM1 [file 17815480]

## Sheet: Export Summary
	This document was exported from Numbers. Each table was converted to an Excel worksheet. All other objects on each Numbers sheet were placed on separate worksheets. Please be aware that formula calculations may differ in Excel.
	Numbers Sheet Name	Numbers Table Name	Excel Worksheet Name
	combined data per person
		Table 1	combined data per person
	Combined data per eye
		Table 1	Combined data per eye
	Sheet1
		Table 1	Sheet1
	titles eye
		Table 1	titles eye

## Sheet: combined data per person
#	Hospital	Hospital number	Living place city/village	Living place country	Date of birth	Gender	Famiy history of RB	eye in the report	Symptom	Specify if other	Age	Date of presentation	Clinical sign	Specify if other	Laterallity	Examination mode	Fix & follow right eye	Fix & follow left eye	Snellen equivalent acuity right eye	Snellen equivalent acuity left eye	Intraocular classification used	Clinical findings right eye	Intraocular classification right eye	Clinical findings left eye	Intraocular classification left eye	Regional lymph node involvement	Specify involved lymph node	Distant metastasis	Distant metastasis location	Heritable trait	International Retinoblastoma Staging System right eye	International Retinoblastoma Staging System left eye	Genetic testing	Imaging	Pathology	Laser therapy	Cryotherapy	IVC	IAC	Plaque brachytherapy	External beam radiotherapy	Primary treatment given right eye	Primary treatment right eye - free text	Primary treatment given left eye	Primary treatment left eye - free text	IRIS/ TM/ SCHLEMM'S CANAL	CM/CB	optic nerve invaion	Choroidal Invasion
1	KAUH	10148300	RIYADH	SYRIA	2014-05-10	2	2		1		35	2017-05-10	1		2	2	1	2	5	5	1	2	2	4	5	2		1		3	1	2	2	3	1	1	1	1	2	1	3	1		7		0	0	0= laminar	1
2	KAUH	10124099	RIYADH	YEMEN	2017-02-02	1	1		1		2	2017-04-04	1		3	2	2	2	5	5	1	4	5	4	5	2		1		3	1	2	2	3	1	1	1	1	2	1	3	1		7		0- NO	0: NO	00=Prelaminar laminar	00: NO invasion
3	KAUH	10130767	RIYADH	KSA	29/09/2016	1	2		1		7	15/05/2017	1		1	2	2	1	5	5	1	4	5	2	1	2		1		3	1	1	2	3	1	1	1	1	2	1	3	7		3		0- NO	0: NO	00=Prelaminar laminar	00: NO invasion
4	KAUH	10117167	RIYADH	PALESTINE	16/11/2016	1	2		1		3	26/02/2017	1		3	2	2	2	5	5	1	4	5	4	5	2		1		3	1	2	2	3	1	1	1	1	2	1	3	7		7		0- NO	0: NO	00=Prelaminar laminar	00: NO invasion
5	KAUH	10069944	QASSIM	JORDAN	28/10/2013	2	2		1		24	25/04/2016	1		2	2	1	2	5	5	1	1	0	4	5	2		1		1	0	3	2	3	1	1	1	1	2	1	3	10		7		0- NO	0: NO	00=Prelaminar laminar	00: NO invasion
6	KAUH	10042819	NAJRAN	KSA	13/12/2013	1	2		2		26	13/12/2015	2		1	2	2	1	5	5	1	4	5	1	0	2		1		1	2	0	2	3	1	1	1	1	2	1	3	2		10		0- NO	0: NO	0= laminar	0: Focal
7	KAUH	2582337	RIYADH	YEMEN	2014-01-10	2	2		1		3	2015-11-01	1		2	2	1	2	5	5	1	1	0	4	5	2		1		1	0	2	2	3	1	1	1	1	2	1	3	10		7		0- NO	1:YES	00=Prelaminar laminar	00: NO invasion
8	KAUH	10071827	RIYADH	NON-SAUDI	14/12/2015	2	2		1		4	2016-03-05	1		3	2	1	1	5	5	1	2	2	4	5	2		1		3	1	2	2	3	1	1	1	1	2	1	3	1		7		0	0	0	1
9	KAUH	10063888	RIYADH	SYRIAN	2015-12-05	1	1		1		10	27/03/2016	2		3	2	2	2	5	5	1	4	4	4	5	2		1		3	1	2	2	3	1	1	1	1	2	1	3	1		7		LT: 0 , RT:1	LT: 0 , RT:1	LT: 00 , RT:0	LT: 00 , RT:1
10	KAUH	10055766	RIYADH	KSA	16/07/2015	1	2		1		7	16/02/2016	1		3	2	1	2	5	5	1	2	2	2	2	2		1		3	1	1	2	3	1	1	1	1	2	1	3	3		3
11	KAUH	10033942	RIYADH	YEMEN	24/03/2015	1	2		1		7	2015-11-01	1		3	2	1	2	5	5	1	1	0	4	4	2		1		3	1	2	2	3	1	1	1	1	2	1	3	1		7		0	0	00=Prelaminar laminar	0
12	KAUH	2579319	RIYADH	SYRIAN	08//02/2013	2	2		1		17	2014-11-01	1		3	2	2	2	5	5	1	4	4	4	4	2		1		1	1	1	2	3	1	1	1	1	2	1	3	3		3
13	KAUH	2584136	RIYADH	SYRIAN	2014-06-05	1	2		1		10	2014-04-11	1		3	2	2	2	5	5	1	1	1	4	5	2		1		3	1	2	2	3	1	1	1	1	2	1	3	1		7		RT:0	0	0	0
14	KAUH	2585493	RIYADH	SYRIAN	15/11/2014	2	2		1		4	29/03/2015	1		3	2	3	3	5	5	1	4	5	4	5	2		1		3	1	1	2	3	1	1	1	1	2	1	3	3		3
15	KAUH	2562231	RIYADH	SUDAN	2012-03-03	1	2		1		13	2013-09-04	1		3	2	3	3	5	5	1	4	4	4	5	2		1		1	1	2	2	3	1	1	1	1	2	1	3	3		7		0	0	0	00: NO invasion
16	KAUH	10007187	RIYADH	SYRIAN	19/05/2014	2	2		1		12	30/05/2015	1		3	2	2	2	5	5	1	4	4	4	5	2		2	CNS	3	1	3	2	3	1	1	1	1	2	1	3	7		7		LT: 1 RT:0	LT: 1 RT:0	LT: 2 , RT :00	LT:1 RT: 0
17	KAUH	2585296	RIYADH	KSA	27/10/2013	1	2		1		12	24/03/2015	1		3	2	1	2	5	5	1	2	2	4	5	2		1		3	1	2	2	3	1	1	1	1	2	1	3	1		7		0	0	00=Prelaminar laminar	00: NO invasion
18	KAUH	2574242	RIYADH	SUDAN	17/12/2013	2	2		2		4	21/03/2014	2		3	2	2	2	5	5	1	4	5	4	4	2		1		1	1	2	2	3	1	1	1	1	2	1	3	6		1		0	1	00=Prelaminar laminar	00: NO invasion
19	KAUH	10005091	RIYADH	EGYPTIAN	19/02/2015	1	2		1		3	2015-03-06	1		3	2	1	2	5	5	1	2	1	4	4	2		1		3	1	1	2	3	1	1	1	1	2	1	3	1		1
20	KAUH	2581322	RIYADH	KSA	15/11/2012	1	2		2		12	18/12/2014	2		1	2	2	1	5	5	1	4	5	1	0	2		1		1	2	0	2	3	1	1	1	1	2	1	3	7		10		0	0	00=Prelaminar laminar	00: NO invasion
21	KKESH	5566540	Damam	KSA	2014-07-11	1	2	OD	1		24	29/06/2016	1, 4	RETINAL MASS, VITROUS SEEDS	1	2	1	1	5	5	1	3	5	0	0	2		1		1	2	0	2	3	1	1	1	1	2	2	3	2,3		10		0	0	1	0
22	KKESH	5561610	MADINA	KSA	2015-01-31	1	2	OD	1		16	20/06/2016	1, 4	NVI, Retrolental mass	3	2	2	1	5	5	1	3	5	2	2	2		1		3	2	1	2	3	1	1	1	1	2	2	3	2,3		1	transpupillary thermotherapy TTT	0	0	1	1
23	KKESH	5536430	ASEER	KSA	2014-07-26	2	2		1,4	DECREASE OF VISION	21	16/05/2016	1, 4	large white retinal lesion with calcification and cottage cheese apperance, vit seeds	2	2	1	2	5	5	1	1	0	3	4	2		1		1	0	2	2	3	1	1	1	1	2	2	3	10		2,3		0	0	0	00: No invasion
24	KKESH	5536410	ABHA	KSA	2013-07-04	1	2		1		24	16/05/2016	1,4	WHITISH AND VACULARISED MASS	1	2	2	1	5	5	1	3	4	1	0	2		1		1	2	0	2	3	1	1	1	1	2	2	3	2		10		0	0	00=Prelaminar laminar	00: No invasion
25	KKESH	5505910	Al Ras	KSA	2013-09-01	2	2		4	DECREASE OF VISION	31	2016-07-04	1,4		1	2	2	1	5	5	1	3	5	1	0	2		1		1	2	0	2	3	1	1	1	1	2	2	3	2,3		10		0	0	1	0
26	KKESH	5453690	Najran	KSA	2013-03-11	1	2		2		34	2016-03-02	4	Chronic RD	2	2	1	2	5	5	1	1	0	4	5	2		1		1	0	2	2	3	1	1	1	1	2	2	3	10		2,3		1	0	0	00: No invasion
27	KKESH	5440540	Makah (Indonaisian(	KSA	2015-05-07	1	2		2		8	17/01/2016	2,4	RAPID ENNARGEMENT OF THE EYE	2	2	2	1	5	5	1	4	5	2	4	2		1		3	2	1	2	3	1	1	1	1	2	2	3	2,3		3, 1	TTT, CRYOTHERAPY, IV carboplatine , Intravitreous Melphalan OS	0	0	1	1
28	KKESH	5433910	Buriydah	KSA	2014-03-24	1	2		1		24	2016-10-02	1		2	2	1	1	5	5	1	1	0	3	5	2		1		1	0	2	2	3	1	1	1	1	2	2	3	10		2,3		0	0	0	1
29	KKESH	5559850	Riyadh	KSA	2016-01-30	1	2		2		4	16/06/2016	2		2	2	1	1	5	5	1	1	0	3	4	2		1		1	0	3	2	3	1	1	1	1	2	2	3	10		2		0	0	0	00: No invasion
30	KKESH	5360360	Yanbu	KSA	2014-06-11	2	2		1		15	2015-04-10	1		3	2	2	2	5	5	1	2	5	3	4	2		3		3	5	5	2	3	1	1	1	1	2	2	3	3,7	TTT, RADIOTHERPY, IAC x 3 , Melphalan injection x 4	2,3		0	0	1	1
31	KKESH	5372550	Riyadh	KSA	2012-10-24	1	2		1		35	19/10/2015	1		2	2	1	2	5	5	1	1	0	3	4	2		1		1	0	2	2	3	1	1	1	1	2	2	3	10		2		0	0	00=Prelaminar laminar	00: No invasion
32	KKESH	5805870	albaha	KSA	2016-04-08	1	2		4	RUL, orbitral celluitis	20	14/12/2017	4	descmatocele	1	2	2	1	5	5	1	5	5	1	0	2		1		1	4	0	2	3	1	1	1	1	2	2	3	2,3		10		1	0	1	1
33	KKESH	6035050	Taif	KSA	2014-05-27	2	2		2				2		2	2	1	1	5	5	1	3	4	1	0	2		1		1	2	0	2	3	1	1	1	1	2	2	3	2,3		10		0	0	00=Prelaminar laminar	1
34	KKESH	5979250	Riyadh	KSA	2017-09-15	2	2		1		3	25/12/2017	1		1	2	3	3	5	5	1	3	4	1	0	2		1		1	2	0	2	3	1	1	1	1	2	2	3	3,2		10		0	0	0	00: No invasion
35	KKESH	6013360	Riyadh	KSA	2016-07-29	2	2		1		18	2018-07-02	1		1	2	2	1	5	5	1	4	5	1	0	2		1		1	2	0	2	3	1	1	1	1	2	2	3	2.3		10		1	0	0	1
36	KKESH	5981420	ABHA	KSA	2016-03-04	2	2		1,2		23	28/12/2017	1		1	2	2	1	5	5	1	2	5	1	0	2		1		1	2	0	2	3	1	1	1	1	2	2	3	2,3		10		0	0	0	1
37	KKESH	6096750	Riyadh	KSA	2016-07-04	1	2		1		22	17/05/2018	1		1	2	2	1	5	5	1	3	4	1	0	2		1		1	2	0	2	3	1	1	1	1	2	2	3	2		10		0	0	0	00: No invasion
38	KKESH	6114580	Riyadh	KSA	2017-02-12	2	2		2		16	24/06/2018	2		3	2	3	3	5	5	1	2	4	3	5	2		1		3	1	2	2	3	1	1	1	1	2	2	3	3		2,3		0	0	0	00: No invasion
39	KKESH	6114590	ASEER	KSA	2017-06-13	2	2		1,4	can't see	12	24/06/2018	1		3	2	3	3	5	5	1	3	5	3	5	2		1		3	2	2	2	3	1	1	1	1	2	2	3	2		2		0	0	0	00: No invasion
40	KKESH	6114590	ASEER	KSA	2017-06-13	2	2		1,4	can't see	12	24/06/2018	4	dim red reflex, RD	3	2	3	3	5	5	1	3	5	3	5	2		1		3	2	2	2	3	1	1	1	1	2	2	3	2		2		0	0	00=Prelaminar laminar	00: No invasion
41	KKESH	6134610	Riyadh	KSA	2018-05-05	2	2		4	Different in apperance between both eyes	2	19/07/2018	4	Mass filling the posterior pole and pusshing the iris	2	2	1	3	5	5	1	1	0	4	5	2		1		1	0	2	2	3	1	1	1	1	2	2	3	10		2,3		1	1	1	1
42	KKESH	5780110	Tabouk	KSA	2014-07-06	1	2		1		36	2017-11-04	1		2	2	1	3	5	5	1	1	0	3	5	2		1		1	0	2	2	3	1	1	1	1	2	2	3	10		2		0	0	0	00: No invasion
43	KKESH	5975830	Riyadh	KSA	2015-07-05	2	2		1		29	20/12/2017	1		3	2	1	1	5	5	1	3	5	1	0	2		1		1	2	0	2	3	1	1	1	1	2	2	3	2		10		0	0	00=Prelaminar laminar	00: No invasion
44	KKESH	5911480	Baish	KSA	2017-06-01	2	2		4	nothing mentioned	4	05/10/2017	4	mass by fundus	2	2	1	1	5	5	1	1	0	2	5	2		1		1	0	2	2	3	1	1	1	1	2	2	3	10		2		0	0	0	0
45	KKESH	5940800	Al Tayif	KSA	2017-04-11	1	2		1,2		8	2017-06-11	1		3	2	3	3	5	5	1	4	3	2	5	2		1		3	2	1	2	3	1	1	1	1	2	2	3	2,3		1,3	TTT	1	0	0	0
46	KKESH	5941730	JEDDAH	KSA	2016-10-29	2	2		4	nothing mentioned	12	2017-12-11	1		2	2	3	3	5	5	1	1	0	4	5	2		1		1	0	2	2	3	1	1	1	1	2	2	3	10		2,3		1	0	1	1
47	KKESH	5849830	Khmis Mushit	KSA	2017-07-01	1	1		4	exam because of family histroy	2	23/08/2017	4	Mass by fundus	3	2	3	3	5	5	1	2	2	3	4	2		1		3	1	2	2	3	1	1	1	1	2	2	3	1,3	TTT, Cryotherapy	2,3		0	0	00=Prelaminar laminar	00: No invasion
48	KKESH	5939130	Hafr al Batin	KSA	2014-09-11	2	2		2		36	2017-03-11	1		1	2	1	1	5	5	1	3	5	1	0	2		1		1	2	0	2	3	1	1	1	1	2	2	3	2		10		0	0	0	00: No invasion
49	KKESH	5923600	Riyadh	KSA	2016-12-12	1	1		1		10	18/10/2017	1		3	2	3	3	5	5	1	2	9	3	5	2		1		3	1	2	2	3	1	1	1	1	2	2	3	1,3	TTT	2,3		0	0	0	0
50	KKESH	5518670	JEDDAH	KSA	2014-10-12	1	2		1,2		18	24/04/2016	1		1	2	1	1	5	5	1	3	3	1	0	2		1		1	2	0	2	3	1	1	1	1	2	2	3	3,1,2	TTT, IV Melphin , IV carbo	10		0	0	0	1
51	KKESH	5900460	Hotat Bany Tamim	KSA	2016-11-24	2	2		1		10	21/09/2017	1,2		1	2	1	1	5	5	1	3	5	1	0	2		1		1	2	0	2	3	1	1	1	1	2	2	3	2,3		10		0	0	00=Prelaminar laminar	1
52	KKESH	5895260	Tabouk	KSA	2017-06-26	1	2		1		2	17/09/2017	1		2	2	2	1	5	5	1	3	4	2	9	2		1		3	2	1	2	3	1	1	1	1	2	2	3	2		1	TTT	0 No	0 No	0 Prelaminar	00: No invasion
53	KKESH	5887950	Riyadh	KSA	2016-07-28	1	2		1,2		13	2017-08-09	1,4	BUPHTHALMOUS?	3	2	3	1	5	5	1	3	5	1	0	2		1		1	2	0	2	3	1	1	1	1	2	2	3	2,3		10		0	0	1	0
54	KKESH	5803790	AL AHSA	KSA	2016-12-14	1			2		4	2017-07-05	4	Mass	3	2	3	3	5	5	1	3	5		1	2		1		1			2	3	1	1	1	1	2	2	3	2		1	TTT	0	0	00=Prelaminar laminar	00: No invasion
55	KKESH	5841210	Najran (Filipino)	KSA	2016-08-14	2	2		1,2		10	06/07/2017	4	Mass by fundus	3	2	1	1	5	5	1	2	2	4	5	2		1		3	1	2	2	3	1	1	1	1	2	2	3	1	TTT, IV CARBOPLATINE, Cryotherapy	2		1	0	00=Prelaminar laminar	00: No invasion
56	KKESH	5834570	Riyadh	KSA	2015-04-27	1	2		1,2		24	18/06/2017	1		2	2	1	2	5	5	1	1	0	3	5	2		1		1	0	2	2	3	1	1	1	1	2	2	3	10		2,3		0	0	0	1
57	KKESH	4627707	bilateral	old files	2012-12-22	1	2		1		12	2013-10-03	1		3	2	3	3	5	5	1				5	2		1		1			2	3	1	1	1	1	2	2	3					0	0	0	0
58	KKESH	5606980	Riyadh	KSA	2012-11-12	2	2		1,2		36	2016-08-28	1,3		2	2	1	1	5	5	1	1	0			2		1		1	0		2	3	1	1	1	1	2	2	3	10		2		0	0	00=Prelaminar laminar	00: No invasion
59	KKESH	5597590	AL QURAYAT	KSA	27/11/2014	1	2		2,4	Blood from the eye	20	21/08/2016	4	hyphema and turbid AC with seeds	2	2	3	3	5	5	1	1	0	4	5	2		1		1	0	2	2	3	1	1	1	1	2	2	3	10		2,3		1	0	00=Prelaminar laminar	1
60	KKESH	5559590	Riyadh (Palstaninan)	KSA	2014-01-13	2	2		1,3		30	16/06/2016	1		1	2	1	1	5	5	1	3	5	1	0	2		1		1	2	0	2	3	1	1	1	1	2	2	3	2		10		0	0	0	0
61	KKESH	5536430	Beshah	KSA	2014-07-26	2	2		1,4	not seeing	23	16/05/2016				2	3	3	5	5	1					2		1		1			2	3	1	1	1	1	2							0	0	1	00: No invasion
62	KKESH	5373430	Hafr al Batin	KSA	16/12/2014	1	2		1,2		10	19/10/2015	1,2		3	2	1	2	5	5	1	2	4	3 VS 4	5	2		1		3	1	2	2	3	1	1	1	1	2	2	3	3,1	TTT, iv carboplatine + intravitreal melphalan	2,3		0	0	1	1
63	KKESH	5368340	MADINA	KSA	29/04/2014	2	2		2		17	13/10/2015	1,2		3	2	1	1	5	5	1	1	4	3	5	2		1		3	1	2	2	3	1	1	1	1	2	2	3	3,1	TTT, IV MELPHALAN	2,3		0	0	00=Prelaminar laminar	00: No invasion
64	KKESH	5419750	Ranyah	KSA	2013-07-30	1	2		1,4	Red eye,	30	17/12/2015	1,4	lid swelling,	1	2	3	3	5	5	1	4	5	1	0	2		1		1	2	0	2	3	1	1	1	1	2	2	3	2,3		10		1	1	0	1
65	KKESH	5418040	JEDDAH	KSA	2014-10-05	1	2		1		14	16/12/2015	1		2	2	1	3	5	4	1	1	0	3	4	2		1		1	0	2	2	3	1	1	1	1	2	2	3	10		2		0	0	00=Prelaminar laminar	00: No invasion
66	KKESH	5416730	Riyadh (Yamani)	KSA	2014-07-15	2	2		1		16	14/12/2015	1		2	2	1	3	5	4	1	1	0	3	5	2		1		1	0	2	2	3	1	1	1	1	2	2	3	10		2		0	0	0	00: No invasion
67	KKESH	5352440	AL QURAYAT	KSA	2013-01-01	1	2		1		33	2015-04-10	1		1	2	1	1	5	5	1	3	5	1	0	2		1		1		0	2	3	1	1	1	1	2	2	3	2		10		0	0	00=Prelaminar laminar	00: No invasion
68	KKESH	4518760	Syrian	SYRIAN	2011-07-26	1	2		1,2		18	2012-12-12	1		2	2	1	1	5	5	1	1	0		4	2		1		1	0		2	3	1	1	1	1	2	2	3	10		2		0	0	00=Prelaminar laminar	0
69	KKESH	4527579		KSA	2012-02-29	1	2		2		11	2013-01-15	2		2	2	1	2	5	5	1	2	3		5	2		1		3			2	3	1	1	1	1	2	2	3	1	TTT+INTRA VITREAL MELPHALAN	2,3		-	-	00=Prelaminar laminar	00: No invasion
70	KKESH	4547640	JEDDAH	KSA	2012-10-26	1	2		1,2		4	2013-03-02	1		2	2	3	3	5	5	1	1	0	3	5	2		1		1	0	2	2	3	1	1	1	1	2	2	3	10		2		0	0	00=Prelaminar laminar	00: No invasion
71	KKESH	4371138	Albaha	KSA	2012-02-19	1	2		2		9	2011-10-22	1		3	2	2	2	5	5	1	2	9	3	5	2		1		3	1	2	2	3	1	1	1	1	2	2	EBRT	1	TTT, CRYO	2,3,7,5	RADIOTHERAPY , IV CARBOPLATIN, INTRAVITREAL MELPHALAN	0	0	00=Prelaminar laminar	00: No invasion
72	KKESH	4550584		KSA	2010-10-10	2	2		4	can't see	28	2013-03-13	1		2	2	1	3	5	5	1	1	0	3	5	2		1		1	0	2	2	3	1	1	1	1	2	2	3	10		2		0	0	0	00: No invasion
73	KKESH	4607360	Hail	KSA	2012-12-22	2	2		1,2		7	2013-08-01	4	Reterolemta mass	e	2	2	1	5	5	1	3	5	2	2	2		1		3	2	1	2	3	1	1	1	1	2	2	3	2,3		1	TTT, Cryotherapy	0	0	0	0
74	KKESH	4602054	JEDDAH	KSA	2013-07-03	2	1		4	nothing mention, possibaly just screening	1	2013-07-24	1		3	2	3	3	5	5	1	2	1	4	5	2		1		3	1	2	2	3	1	1	1	1	2	2	3	1	TTT	2,3		0	1	1	00: No invasion
75	KKESH	4608187		KSA	2009-04-25	1	2		1		54	2013-08-13	1		3	2	1	3	5	4	1	2	1	4	5	2		1		3	1	2	2	3	1	1	1	1	2	2	3	1	TTT, CRYO	2,3		1	0	00=Prelaminar laminar	1
76	KKESH	4442162		KSA	2011-04-15	1	2		1,2		12	2012-05-12	1,2		3	2	1	1	5	5	1					2		1		1			2	3	1	1	1	1	2	2	radiothertpy	2,3		5,2,3	Radiotherapy	1	0	1	0
77	KKESH	4593345	Riyadh	KSA	15/11/2012	2	2		2			2013-06-19	1		1	2	1	1	5	5	1	3	4	1	0	2		1		1	2	0	2	3	1	1	1	1	2	2	3	2,3		10		0	0	00=Prelaminar laminar	00: No invasion
78	KKESH	4625203	Riyadh	KSA	2013-09-07	1	2		1,3		2	2013-09-27	4	buphthalmos	3	2	3	3	5	5	1	2	4	4	5	2		1		3	1	2	2	3	1	1	1	1	2	2	3	1	TTT	2,3		1	1	1	00: No invasion
79	KKESH	5761420	Riyadh	KSA	16/07/2010	2	2		1	gradual decrese of vision	8y	20/03/2017	1		1	2	3	3	4	1	1	4	5	1	0	2		1		1	2	0	2	3	1	1	1	1	2	2	3	2		10		1	0	00=Prelaminar laminar	00: No invasion
80	KKESH	5805050	JEDDAH	KSA	15/05/2015	2			2		3Y5M	2017-05-08	2	Absent RR	3	2	3	3	5	5	1	2	3,2	3	5	2		1		3	1	2	2	3	1	1	1	1	2	2	3	1	transpupillary thermotherapy	2		0	0	0	00: No invasion
81	KKESH	5749560	Riyadh	KSA	21/09/2016	1	2		1,2		5	2017-06-03	4	mass & RD	2	2	1	2	5	5	1	1	0	3	2	2		1		1	0	2	2	3	1	1	1	1	2	2	3	10		2		0	0	00=Prelaminar laminar	00: No invasion
82	KKESH	5724840	Najran	KSA	24/06/2016	2			1,2		7	03/02/2017	1		1	2	3	1	5	5	1	3	3	1	0	2		1		1	2	0	2	3	1	1	1	1	2	2	3	2		10		0	0	0	00: No invasion
83	KKESH	5739400	AL AHSA	KSA	01/05/216	2			1		9	26/02/2017	1,2		2	2	1	1	5	5	1	2	9	4	5	2		1		3	1	2	2	3	1	1	1	1	2	2	3	1	TTT	2		1	0	0	00: No invasion
84	KKESH	5706610	JEDDAH	KSA	24/10/2016	2	2		1		10	16/01/2017	4	Mass	3	2	3	3	5	5	1					2		1		3	2	2	2	3	1	1	1	1	2	2	3	2,3		2,3		0	0	0	0
85	KKESH	5707540	Riyadh	KSA	08/11/215	2	2		1		14	2017-12-01	1		2	2	1	1	5	5	1	1	0	3	4	2		1		1	0	2	2	3	1	1	1	1	2	2	3	10		2,3		0	0	1	0
86	KKESH	5666610	JEDDAH	KSA	20/03/2016	1	2		1,2		8	22/11/2016	1,2		1	2	1	1	5	5	1	3	4	1	0	2		1		1	2	0	2	3	1	1	1	1	2	2	3	2		10		0	0	0	00: No invasion
87	KKESH	5658870	AL AHSA	KSA	22/08/2014	2	2		4	can't see by this eye when cove the other eye	26	2016-08-11	4	mass by b-scan	1	2	3	3	5	5	1	3	4	1	0	2		1		1	2	0	2	3	1	1	1	1	2	2	3	2		10		0	0	00=Prelaminar laminar	00: No invasion
88	KKESH	5656280	Dammam	KSA	27/11/2015	1	2		1		11	2016-03-11	4	mass	1	2	1	1	5	5	1	3	4	1	0	2		1		1	2	0	2	3	1	1	1	1	2	2	3	2		10		0	0	00=Prelaminar laminar	00: No invasion
89	KKESH	5649210	MADINA	KSA	26/06/2010	2	2		1		72	30/10/2016	1		2	2	1	3	5	5	1	1	0	3	5	2		1		1	0	2	2	3	1	1	1	1	2	2	3	10		2,3		0	0	1	1
90	KKESH	5621230	Tabuk	KSA	26/06/2016	2	2		1		2	22/09/2016	1		2	2	1	3	5	5	1	2	9	3	5	2		1		3	1	2	2	3	1	1	1	1	2	2	3	1	TTT	2		0	0	0	00: No invasion
91	KKESH	5642320	Riyadh	KSA	2014-03-10	1	1		1		24	18/10/2016	4		2	2	1	1	5	5	1	1	0	3	5	2		1		1	0	2	2	3	1	1	1	1	2	2	3	10		2,3		0	0	0	1
92	KKESH	5387750			2013-11-01	1										2										2		1		1			2	3	1	1	1	1	2							0	0	1	1
93	KKESH	5381690	JEDDAH	KSA	2014-12-01	1	2		1,2		10	28/10/2015	2		3	2	3	1	5	5	1	3	5	2	2	2		1		3	2	1	2	3	1	1	1	1	2	2	3	2,3		1,3	TTT, IV carboplatine	0	0	0	0
94	KKESH	5375100	Jazan	KSA	2012-01-01	2	2		1,3		48		4	Reterolental mass	1	2	2	1	5	5	1	3	5	1	0	2		1		1	2	0	2	3	1	1	1	1	2	2	3	2,3		10		0	0	1	1
95	KKESH	5347670	MADINA	KSA	2014-09-14	2	2		1,2		9	2015-07-09	4	huge lesion filling the vitreous.	2	2	3	3	5	5	1	1	0	3	5	2		1		1	0	2	2	3	1	1	1	1	2	2	3	10		2,3		0	0	0	0
96	KKESH	5265670	Dammam	KSA	2014-01-01	2	2		1		18	2015-05-05	4	, hyphema, lid redness and swelling ,	1	2			5	5	1	4	5	1	0	2		1		1	3	0	2	3	1	1	1	1	2	2	3					1	1	2	1
97	KKESH	5326150	MADINA	KSA	2015-05-01	2	2		1,4	tearing	3	10/08/2015	1		2	2	3	3	5	5	1	1	0	4	4	2		1		1	0	2	2	3	1	1	1	1	2	2	3	10		2		1	0	0	00: No invasion
98	KKESH	5338050	Riyadh	KSA	2013-03-19	1	2		1		29	29/08/2015	1		1	2	1	1	5	5	1	1	5	1	0	2		1		1	2	0	2	3	1	1	1	1	2	2	3	2,3		10		0	0	1	00: No invasion
99	KKESH	5310960	Hafr al Batin	KSA	2015-01-07	2	2		1,2, 4	PROTRUSION , LID SWELLING ,RENDESS AND WHITIS DISCHARGE	5	13/07/2015	4	LID SWELLING, ECCHEMOSIS	3	2	3	1	5	5	1	3	5	2	2	2		1		3	2	1	2	3	1	1	1	1	2	2	3	2,3		1,3	TTT, IV carboplatin	0	0	00=Prelaminar laminar	00: No invasion
100	KKESH	5269020	Thahran al Janub	KSA	2013-10-15	1	2		4	eye swelling and redness	18	10/05/2015	4	eye swelling and redness	1	2	3	1	5	5	1	4	5	2	2	2		1		3	2	1	2	3	1	1	1	1	2	2	3	2,3		1,3	TTT/CRYO-THERAPY	1	1	1	1
101	KKESH	5151110	JEDDAH	KSA	2010-06-03	2	2		1		54	2014-12-12	4	vitrits +3,inferior white lesion	2	2	3	3	1	1	1	1	0	3	4	2		1		1	0	2	2	3	1	1	1	1	2	2	3	10		3,2		0	0	00=Prelaminar laminar	00: No invasion
102	KKESH	5154450	MADINA	KSA	2013-01-20	1	2		2,4	eye lid swelling and tearing os	23	24/12/2014	1,4	AC hyphema	2	2	1	3	5	5	1	1	0	4	5	2		1		1	0	2	2	3	1	1	1	1	2	2	3	10		2,3		1	1	0	1
103	KKESH	5195090	Dammam	KSA	2015-01-04	1	2		1		1	09/02/2015	4	RETINA MASS	2	2	3	3	5	5	1	1	0	4	5	2		1		1	0	2	2	3	1	1	1	1	2	2	3	10		2		1	0	0	00: No invasion
104	KKESH	5161310		KSA	2012-11-15	2	2		1		24	25/12/2014	1,2		1	2	2	1	5	5	1	4	5	1	0	2		1		1	2	0	2	3	1	1	1	1	2	2	3	2		10		1	0	00=Prelaminar laminar	0
105	KKESH	5177640	Riyadh	KSA	2014-01-28	2	2		1		12	15/01/2015	1		2	2	1	2	5	5	1	1	0	4	5	2		1		1	0	2	2	3	1	1	1	1	2	2	3	10		2		1	0	0	00: No invasion
106	KKESH	5092960	Riyadh	KSA	2013-07-21	2	2		4	can't see	14	30/09/2014	4	Exudative RD & Mass	3	2	1	2	5	5	1	2	3	3	4	2		1		3	1	2	2	3	1	1	1	1	2	2	3	3,1	TTT, Intravitreal Melphalan injection	3,2		0	0	00=Prelaminar laminar	00: No invasion
[truncated: 16 more columns]

## Sheet: Combined data per eye
SERIAL EYE	SERIALPERSON#	Hospital	Hospital number	Living place city/village	Living place country	Date of birth	Gender	Famiy history of RB	eye in the report	Symptom	Leukocoriasympt	Squintsymp	Proptosissymp	Othersymp	Specify if other	Age in months	Date of presentation	Clinical sign	LeukocoriaCS	SquintCS	ProptosisCS	OtherCS	Specify if other	Laterallity	eye	Examination mode	Fix & follow_affected eye	Fix & follow right eye	Fix & follow left eye	Snellen equivalent acuity_affected eye	Snellen equivalent acuity right eye	Snellen equivalent acuity left eye	Intraocular classification used	Clinical findings_affected eye	Clinical findings right eye	Clinical findings left eye	Intraocular classification_affected eye	Intraocular classification right eye	Intraocular classification left eye	Regional lymph node involvement	Specify involved lymph node	Distant metastasis	Distant metastasis location	Heritable trait	International Retinoblastoma Staging System_affected eye	International Retinoblastoma Staging System right eye	International Retinoblastoma Staging System left eye	Genetic testing	Imaging
1	1	KAUH	10148300	RIYADH	SYRIA	2014-05-10	2	2	OS	1	1	2	2	2		35	2017-05-10	1	1	2	2	2		2	OS	2	2	1	2	5	5	5	1	4	2	4	5	2	5	2		1		3	2	1	2	2	3
2	2	KAUH	10124099	RIYADH	YEMEN	2017-02-02	1	1	OD	1	1	2	2	2		2	2017-04-04	1	1	2	2	2		3	OD	2	2	2	2	5	5	5	1	4	4	4	5	5	5	2		1		3	1	1	2	2	3
4	3	KAUH	10130767	RIYADH	KSA	29/09/2016	1	2	OD	1	1	2	2	2		7	15/05/2017	1	1	2	2	2		1	OD	2	2	2	1	5	5	5	1	4	4	2	5	5	1	2		1		3	1	1	1	2	3
5	4	KAUH	10117167	RIYADH	PALESTINE	16/11/2016	1	2	OD	1	1	2	2	2		3	26/02/2017	1	1	2	2	2		3	OD	2	2	2	2	5	5	5	1	4	4	4	5	5	5	2		1		3	1	1	2	2	3
7	5	KAUH	10069944	QASSIM	JORDAN	28/10/2013	2	2	OS	1	1	2	2	2		24	25/04/2016	1	1	2	2	2		2	OS	2	2	1	2	5	5	5	1	4	1	4	5	0	5	2		1		1	3	0	3	2	3
8	6	KAUH	10042819	NAJRAN	KSA	13/12/2013	1	2	OD	2	2	1	2	2		26	13/12/2015	2	2	1	2	2		1	OD	2	2	2	1	5	5	5	1	4	4	1	5	5	0	2		1		1	2	2	0	2	3
9	7	KAUH	2582337	RIYADH	YEMEN	2014-01-10	2	2	OS	1	1	2	2	2		3	2015-11-01	1	1	2	2	2		2	OS	2	2	1	2	5	5	5	1	4	1	4	5	0	5	2		1		1	2	0	2	2	3
11	8	KAUH	10071827	RIYADH	NON-SAUDI	14/12/2015	2	2	OS	1	1	2	2	2		4	2016-03-05	1	1	2	2	2		3	OS	2	1	1	1	5	5	5	1	4	2	4	5	2	5	2		1		3	2	1	2	2	3
12	9	KAUH	10063888	RIYADH	SYRIAN	2015-12-05	1	1	OD	1	1	2	2	2		10	27/03/2016	2	2	1	2	2		3	OD	2	2	2	2	5	5	5	1	4	4	4	4	4	5	2		1		3	1	1	2	2	3
13	9	KAUH	10063888	RIYADH	SYRIAN	2015-12-05	1	1	OS	1	1	2	2	2		10	27/03/2016	2	2	1	2	2		3	OS	2	2	2	2	5	5	5	1	4	4	4	5	4	5	2		1		3	2	1	2	2	3
17	11	KAUH	10033942	RIYADH	YEMEN	24/03/2015	1	2	OS	1	1	2	2	2		7	2015-11-01	1	1	2	2	2		3	OS	2	2	1	2	5	5	5	1	4	1	4	4	0	4	2		1		3	2	1	2	2	3
21	13	KAUH	2584136	RIYADH	SYRIAN	2014-06-05	1	2	OS	1	1	2	2	2		10	2014-04-11	1	1	2	2	2		3	OS	2	2	2	2	5	5	5	1	4	1	4	5	1	5	2		1		3	2	1	2	2	3
24	15	KAUH	2562231	RIYADH	SUDAN	2012-03-03	1	2	OD	1	1	2	2	2		13	2013-09-04	1	1	2	2	2		3	OD	2	3	3	3	5	5	5	1	4	4	4	4	4	5	2		1		1	1	1	2	2	3
26	16	KAUH	10007187	RIYADH	SYRIAN	19/05/2014	2	2	OD	1	1	2	2	2		12	30/05/2015	1	1	2	2	2		3	OD	2	2	2	2	5	5	5	1	4	4	4	4	4	5	2		2	CNS	3	1	1	3	2	3
27	16	KAUH	10007187	RIYADH	SYRIAN	19/05/2014	2	2	OS	1	1	2	2	2		12	30/05/2015	1	1	2	2	2		3	OS	2	2	2	2	5	5	5	1	4	4	4	5	4	5	2		2	CNS	3	3	1	3	2	3
29	17	KAUH	2585296	RIYADH	KSA	27/10/2013	1	2	OS	1	1	2	2	2		12	24/03/2015	1	1	2	2	2		3	OS	2	2	1	2	5	5	5	1	4	2	4	5	2	5	2		1		3	2	1	2	2	3
31	18	KAUH	2574242	RIYADH	SUDAN	17/12/2013	2	2	OS	2	2	1	2	2		4	21/03/2014	2	2	1	2	2		3	OS	2	2	2	2	5	5	5	1	4	4	4	4	5	4	2		1		1	2	1	2	2	3
34	20	KAUH	2581322	RIYADH	KSA	15/11/2012	1	2	OD	2	2	1	2	2		12	18/12/2014	2	2	1	2	2		1	OD	2	2	2	1	5	5	5	1	4	4	1	5	5	0	2		1		1	2	2	0	2	3
35	21	KKESH	5566540	Damam	KSA	2014-07-11	1	2	OD	1	1	2	2	2		24	29/06/2016	1	1	2	2	2		1	OD	2	1	1	1	5	5	5	1	3	3	0	5	5	0	4		1		1	2	2	0	2	2
36	22	KKESH	5561610	MADINA	KSA	2015-01-31	1	2	OD	1	1	2	2	2		16	20/06/2016	1, 4	1	2	2	1	NVI	3	OD	2	2	2	1	5	5	5	1	3	3	2	5	5	2	4		1		3	2	2	1	2	2
38	23	KKESH	5536430	ASEER	KSA	2014-07-26	2	2	OS	1	1	2	2	2		21	16/05/2016	1	1	2	2	2		2	OS	2	2	1	2	5	5	5	1	3	1	3	4	0	4	4		1		1	2	0	2	2	2
39	24	KKESH	5536410	ABHA	KSA	2013-07-04	1	2	OD	1	1	2	2	2		24	16/05/2016	1	1	2	2	2		1	OD	2	2	2	1	5	5	5	1	3	3	1	4	4	0	4		1		1	2	2	0	2	2
40	25	KKESH	5505910	Al Ras	KSA	2013-09-01	2	2	OD	1	2	2	2	2		31	2016-07-04	1	1	2	2	2		1	OD	2	2	2	1	5	5	5	1	3	3	1	5	5	0	4		1		1	2	2	0	2	2
41	26	KKESH	5453690	Najran	KSA	2013-03-11	1	2	OS	2	2	1	2	2		34	2016-03-02	4	2	2	2	1	Chronic RD	2	OS	2	2	1	2	5	5	5	1	4	1	4	5	0	5	4		1		1	2	0	2	2	2
42	27	KKESH	5440540	Makah (Indonaisian)	KSA	2015-05-07	1	2	OS	2	2	1	2	2		8	17/01/2016	2,4	2	1	2	1	buphthalmos	2	OS	2	1	2	1	5	5	5	1	2	4	2	4	5	4	4		1		3	1	2	1	2	2
43	28	KKESH	5433910	Buriydah	KSA	2014-03-24	1	2	OS	1	1	2	2	2		24	2016-10-02	1	1	2	2	2		2	OS	2	1	1	1	5	5	5	1	3	1	3	5	0	5	4		1		1	2	0	2	2	2
44	29	KKESH	5559850	Riyadh	KSA	2016-01-30	1	2	OS	2	2	1	2	2		4	16/06/2016	2	2	1	2	2		2	OS	2	1	1	1	5	5	5	1	3	1	3	4	0	4	4		1		1	3	0	3	2	2
46	30	KKESH	5360360	Yanbu	KSA	2014-06-11	2	2	OS	1	1	2	2	2		15	2015-04-10	1	1	2	2	2		3	OS	2	2	2	2	5	5	5	1	3	2	3	4	5	4	2		3		3	5	5	5	2	2
47	31	KKESH	5372550	Riyadh	KSA	2012-10-24	1	2	OS	1	1	2	2	2		35	19/10/2015	1	1	2	2	2		2	OS	2	2	1	2	5	5	5	1	3	1	3	4	0	4	4		1		1	2	0	2	2	2
48	32	KKESH	5805870	albaha	KSA	2016-04-08	1	2	OD	1,2, 4	2	2	2	2		20	14/12/2017	1, 4	2	2	2	1	Descmatocele	1	OD	2	2	2	1	5	5	5	1	5	5	1	5	5	0	4		1		1	4	4	0	2	2
49	33	KKESH	6035050	Taif	KSA	2014-05-27	2	2	OS	2	2	1	2	2		16	20/09/2015	2	2	1	2	2		2	OS	2	1	1	1	5	5	5	1	1	3	1	0	4	0	4		1		1	0	2	0	2	2
50	34	KKESH	5979250	Riyadh	KSA	2017-09-15	2	2	OD	1	1	2	2	2		3	25/12/2017	1	1	2	2	2		1	OD	2	3	3	3	5	5	5	1	3	3	1	4	4	0	4		1		1	2	2	0	2	2
51	35	KKESH	6013360	Riyadh	KSA	2016-07-29	2	2	OD	1	1	2	2	2		18	2018-07-02	1	1	2	2	2		1	OD	2	2	2	1	5	5	5	1	4	4	1	5	5	0	4		1		1	2	2	0	2	2
52	36	KKESH	5981420	ABHA	KSA	2016-03-04	2	2	OD	1,2	1	1	2	2		23	28/12/2017	1	1	2	2	2		1	OD	2	2	2	1	5	5	5	1	2	2	1	5	5	0	4		1		1	2	2	0	2	2
53	37	KKESH	6096750	Riyadh	KSA	2016-07-04	1	2	OD	1	1	2	2	2		22	17/05/2018	1	1	2	2	2		1	OD	2	2	2	1	5	5	5	1	3	3	1	4	4	0	4		1		1	2	2	0	2	2
54	38	KKESH	6114580	Riyadh	KSA	2017-02-12	2	2	OD	2	2	1	2	2		16	24/06/2018	2	2	1	2	2		3	OD	2	3	3	3	5	5	5	1	2	2	3	4	4	5	4		1		3	1	1	2	2	2
56	39	KKESH	6114590	ASEER	KSA	2017-06-13	2	2	OS	1	1	2	2	2		12	24/06/2018	1	1	2	2	2		3	OS	2	3	3	3	5	5	5	1	3	3	3	5	5	5	4		1		3	2	2	2	2	2
59	40	KKESH	6114590	ASEER	KSA	2017-06-13	2	2	OD	1	1	2	2	2		12	24/06/2018	1	2	2	2	2		3	OD	2	3	3	3	5	5	5	1	3	3	3	5	5	5	4		1		3	2	2	2	2	2
60	41	KKESH	6134610	Riyadh	KSA	2018-05-05	2	2	OS	1	2	2	2	2		2	19/07/2018	1	2	2	2	2		2	OS	2	3	1	3	5	5	5	1	4	1	4	5	0	5	4		1		1	2	0	2	2	2
61	42	KKESH	5780110	Tabouk	KSA	2014-07-06	1	2	OS	1	1	2	2	2		36	2017-11-04	1	1	2	2	2		2	OS	2	3	1	3	5	5	5	1	3	1	3	5	0	5	4		1		1	2	0	2	2	2
62	43	KKESH	5975830	Riyadh	KSA	2015-07-05	2	2	OD	1	1	2	2	2		29	20/12/2017	1	1	2	2	2		3	OD	2	1	1	1	5	5	5	1	3	3	1	5	5	0	4		1		1	2	2	0	2	2
64	44	KKESH	5911480	Baish	KSA	2017-06-01	2	2	OS	1	2	2	2	2		4	05/10/2017	1	2	2	2	2		2	OS	2	1	1	1	5	5	5	1	2	1	2	5	0	5	4		1		1	2	0	2	2	2
66	45	KKESH	5940800	Al Tayif	KSA	2017-04-11	1	2	OS	1,2	1	1	2	2		8	2017-06-11	1	1	2	2	2		3	OS	2	3	3	3	5	5	5	1	2	4	2	5	3	5	4		1		3	1	2	1	2	2
67	46	KKESH	5941730	JEDDAH	KSA	2016-10-29	2	2	OS	1	2	2	2	2		12	2017-12-11	1	1	2	2	2		2	OS	2	3	3	3	5	5	5	1	4	1	4	5	0	5	4		1		1	2	0	2	2	2
69	47	KKESH	5849830	Khmis Mushit	KSA	2017-07-01	1	1	OS	1	2	2	2	2		2	23/08/2017	1	2	2	2	2		3	OS	2	3	3	3	5	5	5	1	3	2	3	4	2	4	4		1		3	2	1	2	2	2
70	48	KKESH	5939130	Hafr al Batin	KSA	2014-09-11	2	2	OD	2	2	1	2	2		36	2017-03-11	1	1	2	2	2		1	OD	2	1	1	1	5	5	5	1	3	3	1	5	5	0	4		1		1	2	2	0	2	2
72	49	KKESH	5923600	Riyadh	KSA	2016-12-12	1	1	OS	1	1	2	2	2		10	18/10/2017	1	1	2	2	2		3	OS	2	3	3	3	5	5	5	1	3	2	3	5	9	5	4		1		3	2	1	2	2	2
73	50	KKESH	5518670	JEDDAH	KSA	2014-10-12	1	2	OD	1,2	1	1	2	2		18	24/04/2016	1	1	2	2	2		1	OD	2	1	1	1	5	5	5	1	3	3	1	3	3	0	4		1		1	2	2	0	2	2
74	51	KKESH	5900460	Hotat Bany Tamim	KSA	2016-11-24	2	2	OD	1	1	2	2	2		10	21/09/2017	1,2	1	1	2	2		1	OD	2	1	1	1	5	5	5	1	3	3	1	5	5	0	4		1		1	2	2	0	2	2
77	53	KKESH	5887950	Riyadh	KSA	2016-07-28	1	2	OD	1,2	1	1	2	2		13	2017-08-09	1,4	1	2	2	1	buphthalmos	1	OD	2	3	3	1	5	5	5	1	3	3	1	5	5	0	4		1		1	2	2	0	2	2
79	54	KKESH	5803790	AL AHSA	KSA	2016-12-14	1	2	OD	2	2	1	2	2		4	2017-07-05	1	2	2	2	2		3	OD	2	2	2	1	5	5	5	1	3	3	4	5	5	1	2		1		1	2	2	1	2	2
82	55	KKESH	5841210	Najran (Filipino)	KSA	2016-08-14	2	2	OS	1,2	1	1	2	2		10	06/07/2017	1	2	2	2	2		3	OS	2	1	1	1	5	5	5	1	4	2	4	5	2	5	4		1		3	2	1	2	2	2
83	56	KKESH	5834570	Riyadh	KSA	2015-04-27	1	2	OS	1,2	1	1	2	2		24	18/06/2017	1	1	2	2	2		2	OS	2	2	1	2	5	5	5	1	3	1	3	5	0	5	4		1		1	2	0	2	2	2
84	57	KKESH	4627707	RIYADH	KSA	2012-12-22	1	2	OD	1	1	2	2	2		12	2013-10-03	1	1	2	2	2		3	OD	2				5	5	5	1						5									2	2
86	58	KKESH	5606980	Riyadh	KSA	2012-11-12	2	2	OS	1,2	1	1	2	2		36	2016-08-28	1,3	1	2	1	2		2	OS	2	1	1	1	5	5	5	1		1			0		4		1		1		0		2	2
87	59	KKESH	5597590	AL QURAYAT	KSA	27/11/2014	1	2	OS	2,4	2	1	2	2		20	21/08/2016	4	2	2	2	1	hyphema and AC seeds ( pseudohypopyon)	2	OS	2	3	3	3	5	5	5	1	4	1	4	5	0	5	4		1		1	2	0	2	2	2
88	60	KKESH	5559590	Riyadh (Palstaninan)	KSA	2014-01-13	2	2	OD	1,3	1	2	1	2		30	16/06/2016	1	1	2	2	2		1	OD	2	1	1	1	5	5	5	1	3	3	1	5	5	0	4		1		1	2	2	0	2	2
89	61	KKESH	5536430	Beshah	KSA	2014-07-26	2	2	OD	1,2	1	2	2	2		23	16/05/2016	1	2	2	2	2		1	OD	2				5	5	5	1															2
92	62	KKESH	5373430	Hafr al Batin	KSA	16/12/2014	1	2	OS	1,2	1	1	2	2		10	19/10/2015	1,2	1	1	2	2		3	OS	2	2	1	2	5	5	5	1	4	2	4	5	4	5	4		1		3	2	1	2	2	2
93	63	KKESH	5368340	MADINA	KSA	29/04/2014	2	2	OD	2	2	1	2	2		17	13/10/2015	1,2	1	1	2	2		3	OD	2	1	1	1	5	5	5	1	1	1	3	4	4	5	4		1		3	1	1	2	2	2
95	64	KKESH	5419750	Ranyah	KSA	2013-07-30	1	2	OD	1	1	2	2	2		30	17/12/2015	1,4	1	2	2	1	LID SWELLING, ECCHEMOSIS	1	OD	2	3	3	3	5	5	5	1	4	4	1	5	5	0	4		1		1	2	2	0	2	2
96	65	KKESH	5418040	JEDDAH	KSA	2014-10-05	1	2	OS	1	1	2	2	2		14	16/12/2015	1	1	2	2	2		2	OS	2	3	1	3	5	5	4	1	3	1	3	4	0	4	4		1		1	2	0	2	2	2
97	66	KKESH	5416730	Riyadh (Yamani)	KSA	2014-07-15	2	2	OS	1	1	2	2	2		16	14/12/2015	1	1	2	2	2		2	OS	2	3	1	3	5	5	4	1	3	1	3	5	0	5	4		1		1	2	0	2	2	2
98	67	KKESH	5352440	AL QURAYAT	KSA	2013-01-01	1	2	OD	1	1	2	2	2		33	2015-04-10	1	1	2	2	2		1	OD	2	1	1	1	5	5	5	1	3	3	1	5	5	0	4		1		1			0	2	2
99	68	KKESH	4518760	Syrian	SYRIAN	2011-07-26	1	2	OS	1,2	1	1	2	2		18	2012-12-12	1	1	2	2	2		2	OS	2	1	1	1	5	5	5	1	3	1	3	4	0	4	4		1		1		0		2	2
100	69	KKESH	4527579	Riyadh	KSA	2012-02-29	1	2	OS	2	2	1	2	2		11	2013-01-15	2	2	1	2	2		2	OS	2	2	1	2	5	5	5	1				5	3	5	4		1		3				2	2
101	70	KKESH	4547640	JEDDAH	KSA	2012-10-26	1	2	OS	1,2	1	1	2	2		4	2013-03-02	1	1	2	2	2		2	OS	2	3	3	3	5	5	5	1	3	1	3	5	0	5	4		1		1	2	0	2	2	2
103	71	KKESH	4371138	Albaha	KSA	2012-02-19	1	2	OS	2	2	1	2	2		9	2011-10-22	1	1	2	2	2		3	OS	2	2	2	2	5	5	5	1	3	2	3	5	9	5	4		1		3	2	1	2	2	2
104	72	KKESH	4550584		KSA	2010-10-10	2	2	OS	1,2, 4	2	2	2	2		28	2013-03-13	1	1	2	2	2		2	OS	2	3	1	3	5	5	5	1	3	1	3	5	0	5	4		1		1	2	0	2	2	2
2	73	KKESH	4607360	Hail	KSA	2012-12-22	2	2	OD	1,2	1	1	2	2		7	2013-08-01	1	2	2	2	2		3	OD	2	2	2	1	5	5	5	1	3	3	2	5	5	2	4		1		3	2	2	1	2	2
108	74	KKESH	4602054	JEDDAH	KSA	2013-07-03	2	1	OS	1	2	2	2	2		1	2013-07-24	1	1	2	2	2		3	OS	2	3	3	3	5	5	5	1	4	2	4	5	1	5	4		1		3	2	1	2	2	2
110	75	KKESH	4608187		KSA	2009-04-25	1	2	OS	1	1	2	2	2		54	2013-08-13	1	1	2	2	2		3	OS	2	3	1	3	5	5	4	1	4	2	4	5	1	5	4		1		3	2	1	2	2	2
111	76 A	KKESH	4442162		KSA	2011-04-15	1	2	OD	1,2	1	1	2	2		12	2012-05-12	1,2	1	1	2	2		3	OD	2	1	1	1	5	5	5	1				5	5	5	4		1		3		2	2	2	2
112	76 B	KKESH	4442162		KSA	2011-04-15	1	2	OS	1,2	1	1	2	2		12	2012-05-12	1,2	1	1	2	2		3	OS	2	1	1	1	5	5	5	1				5	5	5	4		1		3		2	2	2	2
113	77	KKESH	4593345	Riyadh	KSA	15/11/2012	2	2	OD	2	2	1	2	2		7	2013-06-19	1	1	2	2	2		1	OD	2	1	1	1	5	5	5	1	3	3	1	4	4	0	4		1		1	2	2	0	2	2
114	78 A	KKESH	4625203	Riyadh	KSA	2013-09-07	1	2	OD	1,3	1	2	1	2		2	2013-09-27	4	2	2	2	1	buphthalmos	3	OD	2	3	3	3	5	5	5	1	2	2	4	4	4	5	4		1		3	1	1	2	2	2
115	78 B	KKESH	4625203	Riyadh	KSA	2013-09-07	1	2	OS	1,3	1	2	1	2		2	2013-09-27	4	2	2	2	1	buphthalmos	3	OS	2	3	3	3	5	5	5	1	4	2	4	5	4	5	4		1		3	2	1	2	2	2
116	79	KKESH	5761420	Riyadh	KSA	16/07/2010	2	2	OD	1	1	2	2	2		8y	20/03/2017	1	1	2	2	2		1	OD	2	3	3	3	4	4	1	1	4	4	1	5	5	0	4		1		1	2	2	0	2	2
118	80	KKESH	5805050	JEDDAH	KSA	15/05/2015	2	2	OS	2	2	1	2	2		3Y5M	2017-05-08	2	2	1	2	2		3	OS	2	3	3	3	5	5	5	1	3	2	3	5	3,2	5	4		1		3	2	1	2	2	2
119	81	KKESH	5749560	Riyadh	KSA	21/09/2016	1	2	OS	1,2	1	1	2	2		5	2017-06-03	1	2	2	2	2		2	OS	2	2	1	2	5	5	5	1	3	1	3	2	0	2	4		1		1	2	0	2	2	2
120	82	KKESH	5724840	Najran	KSA	24/06/2016	2	2	OD	1,2	1	1	2	2		7	03/02/2017	1	1	2	2	2		1	OD	2	3	3	1	5	5	5	1	3	3	1	3	3	0	4		1		1	2	2	0	2	2
121	83	KKESH	5739400	AL AHSA	KSA	01/05/216	2	2	OS	1	1	2	2	2		9	26/02/2017	1,2	1	1	2	2		2	OS	2	1	1	1	5	5	5	1	4	2	4	5	9	5	4		1		3	2	1	2	2	2
122	84 A	KKESH	5706610	JEDDAH	KSA	24/10/2016	2	2	OD	1	1	2	2	2		10	16/01/2017	1	2	2	2	2		3	OD	2	3	3	3	5	5	5	1	4	4	2	5			4		1		3	2	2	2	2	2
123	84 B	KKESH	5706610	JEDDAH	KSA	24/10/2016	2	2	OS	1	1	2	2	2		10	16/01/2017	1	2	2	2	2		3	OS	2	3	3	3	5	5	5	1	4	4	2	5			4		1		3	2	2	2	2	2
124	85	KKESH	5707540	Riyadh	KSA	08/11/215	2	2	OS	1	1	2	2	2		14	2017-12-01	1	1	2	2	2		2	OS	2	1	1	1	5	5	5	1	3	1	3	4	0	4	4		1			2	0	2	2	2
125	86	KKESH	5666610	JEDDAH	KSA	20/03/2016	1	2	OD	1,2	1	1	2	2		8	22/11/2016	1,2	1	1	2	2		1	OD	2	1	1	1	5	5	5	1	3	3	1	4	4	0	4		1			2	2	0	2	2
126	87	KKESH	5658870	AL AHSA	KSA	22/08/2014	2	2	OD	1	2	2	2	2		26	2016-08-11	1	2	2	2	2		1	OD	2	3	3	3	5	5	5	1	3	3	1	4	4	0	4		1			2	2	0	2	2
127	88	KKESH	5656280	Dammam	KSA	27/11/2015	1	2	OD	1	1	2	2	2		11	2016-03-11	1	2	2	2	2		1	OD	2	1	1	1	5	5	5	1	3	3	1	4	4	0	4		1			2	2	0	2	2
128	89	KKESH	5649210	MADINA	KSA	26/06/2010	2	2	OS	1	1	2	2	2		72	30/10/2016	1	1	2	2	2		2	OS	2	3	1	3	5	5	5	1	3	1	3	5	0	5	4		1			2	0	2	2	2
129	90	KKESH	5621230	Tabuk	KSA	26/06/2016	2	2	OS	1	1	2	2	2		2	22/09/2016	1	1	2	2	2		2	OS	2	3	1	3	5	5	5	1	3	2	3	5	9	5	4		1		3	2	1	2	2	2
130	91	KKESH	5642320	Riyadh	KSA	2014-03-10	1	1	OS	1	1	2	2	2		24	18/10/2016	1	2	2	2	2		2	OS	2	1	1	1	5	5	5	1	3	1	3	5	0	5	4		1		1	2	0	2	2	2
131	92	KKESH	5387750		KSA	2013-11-01	1	2	OD	1	2	2	2	2		11	2014-12-11	1	2	2	2	2		1	OD	2																						2	2
133	93	KKESH	5381690	JEDDAH	KSA	2014-12-01	1	2	OD	1,2	1	1	2	2		10	28/10/2015	2	2	1	2	2		3	OD	2	3	3	1	5	5	5	1	3	3	2	5	5	2	4		1		3	2	2	1	2	2
135	94	KKESH	5375100	Jazan	KSA	2012-01-01	2	2	OD	1,3	1	2	1	2		48		1	2	2	2	2		1	OD	2	2	2	1	5	5	5	1	3	3	1	5	5	0	4		1		1	2	2	0	2	2
136	95	KKESH	5347670	MADINA	KSA	2014-09-14	2	2	OS	1,2	1	1	2	2		9	2015-07-09	1	2	2	2	2		2	OS	2	3	3	3	5	5	5	1	3	1	3	5	0	5	4		1		1	2	0	2	2	2
137	96	KKESH	5265670	Dammam	KSA	2014-01-01	2	2	OD	1	1	2	2	2		18	2015-05-05	4	2	2	2	1	hyphema and AC seeds ( pseudohypopyon)	1	OD	2				5	5	5	1	4	4	1	5	5	0	4		1			3	3	0	2	2
138	97	KKESH	5326150	MADINA	KSA	2015-05-01	2	2	OS	1	1	2	2	2		3	10/08/2015	1	1	2	2	2		2	OS	2	3	3	3	5	5	5	1	4	1	4	4	0	4	4		1		1	2	0	2	2	2
139	98	KKESH	5338050	Riyadh	KSA	2013-03-19	1	2	OD	1	1	2	2	2		29	29/08/2015	1	1	2	2	2		1	OD	2	1	1	1	5	5	5	1			1	5	5	0	4		1		1	2	2	0	2	2
140	99	KKESH	5310960	Hafr al Batin	KSA	2015-01-07	2	2	OD	1,2	1	1	2	2		5	13/07/2015	4	2	2	2	1	LID SWELLING, ECCHEMOSIS	3	OD	2	3	3	1	5	5	5	1	3	3	2	5	5	2	4		1		3	2	2	1	2	2
142	100	KKESH	5269020	Thahran al Janub	KSA	2013-10-15	1	2	OD	1	2	2	2	2		18	10/05/2015	4	2	2	2	1	LID SWELLING, ECCHEMOSIS	1	OD	2	3	3	1	5	5	5	1	4	4	2	5	5	2	4		1		3	2	2	1	2	2
143	101	KKESH	5151110	JEDDAH	KSA	2010-06-03	2	2	OS	1	1	2	2	2		54	2014-12-12	4	2	2	2	2		2	OS	2	3	3	3	1	1	1	1	3	1	3	4	0	4	4		1		1	2	0	2	2	2
144	102	KKESH	5154450	MADINA	KSA	2013-01-20	1	2	OS	2	2	1	2	2		23	24/12/2014	1,4	1	2	2	1	hyphema and AC seeds ( pseudohypopyon)	2	OS	2	3	1	3	5	5	5	1	4	1	4	5	0	5	4		1		1	2	0	2	2	2
145	103	KKESH	5195090	Dammam	KSA	2015-01-04	1	2	OS	1	1	2	2	2		1	09/02/2015	4	2	2	2	2		2	OS	2	3	3	3	5	5	5	1	4	1	4	5	0	5	4		1		1	2	0	2	2	2
146	104	KKESH	5161310		KSA	2012-11-15	2	2	OD	1	1	2	2	2		24	25/12/2014	1,2	1	1	2	2		1	OD	2	2	2	1	5	5	5	1	4	4	1	5	5	0	4		1		1	2	2	0	2	2
147	105	KKESH	5177640	Riyadh	KSA	2014-01-28	2	2	OS	1	1	2	2	2		12	15/01/2015	1	1	2	2	2		2	OS	2	2	1	2	5	5	5	1	4	1	4	5	0	5	4		1		1	2	0	2	2	2
149	106	KKESH	5092960	Riyadh	KSA	2013-07-21	2	2	OS	1	2	2	2	2		14	30/09/2014	1	2	2	2	2		3	OS	2	2	1	2	5	5	5	1	3	2	3	4	3	4	4		1		3	2	1	2	2	2
[truncated: 49 more columns]

## Sheet: Sheet1
8th AJCC Pathological Classification	7th AJCC Pathological Classification
0= pTX	0= pTX
1= pT0	1= pT1
2= pT1	2= pT2a
3= pT2a	3= pT2b
4 = pT2b	4= pT3a
5= pT3a	5 = pT3b
6= pT3b	6= pT4a
7= pT3c	7= pT4b
8= pT3d
9=pT4

## Sheet: titles eye
SERIAL EYE
SERIALPERSON#
Hospital
Hospital number
Living place city/village
Living place country
Date of birth
Gender
Famiy history of RB
eye in the report
Symptom
Specify if other
Age
Date of presentation
Clinical sign
Specify if other
Laterallity
eye
Examination mode
Fix & follow_affected eye
Fix & follow right eye
Fix & follow left eye		Growth pattern	Origin	Calcification	Necrosis	Mitotic figures	focality	Pathological Classification	Last Follow up Non enucleated Eye	Local orbital Recurrence or secondary Tumor
Snellen equivalent acuity_affected eye
Snellen equivalent acuity right eye		1 = Focal therapy	2 = Enucleation	3 = IVC	4 = IAC	5 = EBRT	6 = Exenteration	7 = Combination therapy	8 = Palliative care	9 = Treatment refusal
Snellen equivalent acuity left eye
Intraocular classification used		0: No seeding	1: vitreous	2: subretinal	3:Sub RPE
Clinical findings_affected eye
Clinical findings right eye
Clinical findings left eye
Intraocular classification_affected eye
Intraocular classification right eye
Intraocular classification left eye
Regional lymph node involvement
Specify involved lymph node
Distant metastasis
Distant metastasis location
Heritable trait
International Retinoblastoma Staging System_affected eye
International Retinoblastoma Staging System right eye
International Retinoblastoma Staging System left eye
Genetic testing
Imaging
Pathology
Laser therapy
Cryotherapy
IVC
IAC
Plaque brachytherapy
External beam radiotherapy
Primary treatment given_affected eye
Primary treatment affected eye - free text
Primary treatment given right eye
Primary treatment right eye - free text
Primary treatment given left eye
Primary treatment left eye - free text
IRIS/ TM/ SCHLEMM'S CANAL
CM/CB
optic nerve invaion
Choroidal Invasion
Scleral/Extrascleral invasion
0: No seeding
0=undefrrentiated
0= UNILATERAL
0= LEES 1/3
0= endophytic
0=inner layer
0= minimal
0= < 20%
0=RARE
0= uni
0= pTX
0= Regressed
0 = NO
